# Supplementary material for: In vitro and in vivo comparison of transport media for detecting nasopharyngeal carriage of Streptococcus pneumoniae
Source: PeerJ. 2016 Sep 22;4:e2449. doi: 10.7717/peerj.2449 (PMC5036082; doi:10.7717/peerj.2449)
Supplement: Supplemental Information 2 — The file includes an IDnr for each child and the result on pneumococcal carriage (yes = 1, no = 0) for the swabs that were incubated the first 3 h on enrichment broth (carriageBrothNoReculturing and carriageBroth), and for the swabs that were incubated in STGG (carriageSTGGNoReculturing and carriageSTGG). The variables that include the message ”NoReculturing” present the results on carriage after one night incubation, while the variables lacking that message, present the results on carriage after reculturing and incubation overnight. Reculturing was done for swabs that were tested positive in the agglutination test, but which were initially negative on the blood agar. [file peerj-04-2449-s002.xlsx]

## Sheet: in vitro
dilution	serotype	media	CFU	Ct
0.01	19F	broth	uncountable	30.1056
0.01	19F	broth	uncountable	30.1661
0.01	19F	broth	uncountable	30.3481
0.001	19F	broth	66	33.0351
0.001	19F	broth	67	33.0122
0.001	19F	broth	48	32.7902
0.0001	19F	broth	4	37.167
0.0001	19F	broth	11	37.3583
0.0001	19F	broth	2	39.6867
1e-05	19F	broth	1	above the cut off
1e-05	19F	broth	1	above the cut off
1e-05	19F	broth	3	39.4025
0.01	19F	STGG	uncountable	31.0736
0.01	19F	STGG	uncountable	31.1203
0.01	19F	STGG	uncountable	31.2054
0.001	19F	STGG	73	34.055
0.001	19F	STGG	69	33.7485
0.001	19F	STGG	66	33.2935
0.0001	19F	STGG	9	37.0332
0.0001	19F	STGG	7	39.184
0.0001	19F	STGG	8	39.3477
1e-05	19F	STGG	1	above the cut off
1e-05	19F	STGG	0	above the cut off
1e-05	19F	STGG	1	above the cut off
0.01	4	broth	uncountable	30.3259
0.01	4	broth	uncountable	30.2804
0.01	4	broth	uncountable	30.2443
0.001	4	broth	137	32.2824
0.001	4	broth	132	33.0038
0.001	4	broth	137	33.1175
0.0001	4	broth	14	36.7501
0.0001	4	broth	25	36.2909
0.0001	4	broth	27	36.197
1e-05	4	broth	1	38.3917
1e-05	4	broth	1	38.6659
1e-05	4	broth	5	above the cut off
0.01	4	STGG	uncountable	29.1104
0.01	4	STGG	uncountable	29.1681
0.01	4	STGG	uncountable	29.2206
0.001	4	STGG	241	32.3232
0.001	4	STGG	266	32.1467
0.001	4	STGG	268	32.105
0.0001	4	STGG	24	35.8059
0.0001	4	STGG	27	36.5203
0.0001	4	STGG	29	36.8662
1e-05	4	STGG	4	38.557
1e-05	4	STGG	7	38.3495
1e-05	4	STGG	4	above the cut off
0.01	3	broth	500	28.0727
0.01	3	broth	500	28.1364
0.01	3	broth	500	28.2755
0.001	3	broth	131	34.1342
0.001	3	broth	136	33.9499
0.001	3	broth	141	33.1288
0.0001	3	broth	20	36.5865
0.0001	3	broth	15	36.8921
0.0001	3	broth	19	36.9158
1e-05	3	broth	3	39.8191
1e-05	3	broth	9	39.4492
1e-05	3	broth	1	above the cut off
0.01	3	STGG	315	28.6087
0.01	3	STGG	362	29.7209
0.01	3	STGG	331	29.7614
0.001	3	STGG	64	33.9072
0.001	3	STGG	64	33.154
0.001	3	STGG	48	32.5788
0.0001	3	STGG	3	35.5962
0.0001	3	STGG	8	36.2697
0.0001	3	STGG	7	36.6624
1e-05	3	STGG	0	37.8001
1e-05	3	STGG	1	above the cut off
1e-05	3	STGG	2	above the cut off
